# Supplementary material for: First insight of the genome-wide association study and genomic prediction into enteritis disease (Vibrio harveyi) resistance trait in the lined seahorse (Hippocampus erectus)
Source: Front Immunol. 2024 Oct 3;15:1474746. doi: 10.3389/fimmu.2024.1474746 (PMC11484275; doi:10.3389/fimmu.2024.1474746)
Supplement: Supplementary file 1 [file Table1.xlsx]

## Sheet: Sheet1
Table S1 Information of sequencing data
Sample	Raw base(G)	Raw reads	Clean base(G)	Clean reads	Effective Rate(%)	Q20(%)	Q30(%)	GC(%)	Mapped ratio(%)	Deepth
dead1	14.68	48942746	14.63	48941300	100	98.55	94.31	43.56	93.27	28.42
dead2	12.37	41230609	12.31	41208264	99.95	98.76	94.29	43.88	88.76	22.65
dead3	16.45	54841039	16.39	54811767	99.95	98.78	94.37	43.28	93.3	31.85
dead4	13.3	44331511	13.25	44330115	100	98.48	94.08	44.05	85.41	23.39
dead5	11.16	37200891	11.12	37199753	100	98.49	94.05	44.06	86.54	20
dead6	12.67	42238535	12.62	42237298	100	98.37	93.68	43.85	87.64	23.01
dead7	27.13	90425572	27.01	90343305	99.91	99.25	96.28	43.63	90.42	50.12
dead8	11.69	38966618	11.64	38965447	100	98.42	93.86	43.98	88.86	21.59
dead9	13.69	45619797	13.63	45618433	100	98.41	93.81	43.74	91.4	25.95
dead10	11.81	39356689	11.77	39355534	100	98.37	93.67	43.81	91.24	22.45
dead11	19.39	64636440	19.31	64603182	99.95	98.67	93.89	43.86	89.7	35.64
dead12	13.49	44970770	13.43	44969395	100	98.48	94.12	43.96	89.33	24.91
dead13	16.59	55309419	16.51	55280491	99.95	98.69	94.01	43.48	94.51	32.43
dead14	21.21	70716399	21.13	70678319	99.95	98.78	94.39	43.65	90.2	39.41
dead15	19.19	63957025	19.1	63922324	99.95	98.74	94.23	43.97	88.56	34.99
dead16	14.44	48123831	14.37	48122232	100	98.87	94.7	44.14	87.43	26.16
dead17	12.03	40103378	11.99	40102108	100	98.42	93.85	43.83	89.1	22.28
dead18	15.28	50936615	15.14	50935369	100	99.39	96.94	47.63	87.72	26.86
dead19	14.42	48057158	14.35	48056136	100	99.1	95.64	43.7	90.29	26.89
dead20	14.22	47397223	14.17	47395807	100	98.5	94.12	43.83	86.91	25.57
dead22	17.42	58069563	17.34	58038983	99.95	98.73	94.17	43.65	87.06	31.15
dead23	20.94	69812261	20.86	69810735	100	99.1	95.59	43.74	89.47	38.57
dead24	17.96	59860920	17.88	59829534	99.95	98.67	93.88	43.87	91.25	33.8
dead25	19.08	63605353	19	63604067	100	98.98	95	43.59	90.09	35.52
dead26	13.69	45648986	13.54	45647906	100	99.42	97.09	48.06	90.59	24.99
dead27	14.49	48312433	14.43	48311361	100	98.96	94.95	43.72	89.69	26.89
dead28	14.81	49362839	14.64	49361641	100	99.41	97.05	47.92	94	27.87
dead29	20.37	67915262	20.29	67913758	100	98.94	94.85	43.88	90.51	37.9
dead30	17.45	58172237	17.39	58140618	99.95	98.84	94.67	44	90.71	32.63
dead31	18.62	62064769	18.53	62031635	99.95	98.73	94.14	44.29	87.47	33.33
dead32	20.37	67899388	20.28	67863071	99.95	98.73	94.16	43.63	93.92	39.32
dead33	17.57	58559193	17.49	58557855	100	99.13	95.74	43.84	89.47	32.37
dead34	25.29	84304958	25.19	84303174	100	99.02	95.24	43.7	90.99	46.93
dead35	24.72	82413333	24.61	82411582	100	98.87	94.53	43.46	87.97	44.59
dead36	17.85	59499145	17.76	59497786	100	99.03	95.27	43.81	91.63	33.72
dead37	17.64	58805877	17.56	58774674	99.95	98.74	94.23	43.81	86.66	31.34
dead38	12.45	41509657	12.39	41508737	100	99.33	96.66	45.53	88.73	22.68
dead39	18.13	60448622	18.05	60417434	99.95	98.63	93.67	43.75	87.36	32.48
dead40	20.77	69230919	20.67	69192986	99.95	98.95	95.2	44.43	93.98	40.07
dead41	12.56	41874785	12.49	41852177	99.95	98.78	94.48	44.13	88.73	23
dead42	16.48	54943170	16.4	54913346	99.95	98.86	94.77	44.17	93.28	31.73
dead43	16.04	53472567	15.95	53471435	100	99.19	96.04	44.42	92.28	30.48
dead44	17.33	57755771	17.25	57754649	100	98.97	94.98	43.84	92.52	33.16
dead45	17.63	58777865	17.54	58776664	100	99.16	95.79	45.05	91.12	32.95
dead46	20.81	69356230	20.67	69354462	100	99.33	96.67	45.86	90.22	37.98
dead47	16.38	54612796	16.31	54582948	99.95	98.88	94.88	43.72	94.19	31.92
dead48	21.21	70692262	21.07	70652588	99.94	99.03	95.57	45.72	93.19	40.16
dead49	16.39	54631599	16.32	54630458	100	99.12	95.69	44.13	83.31	28.13
dead50	24.44	81456762	24.31	81412359	99.95	98.9	94.97	44.46	94.17	46.9
dead51	18.23	60780610	18.13	60748281	99.95	98.86	94.73	45.06	88.93	33.19
dead52	16.78	55921953	16.69	55891491	99.95	98.82	94.57	43.75	92.1	31.9
dead53	10.87	36248646	10.82	36247879	100	99.12	95.73	43.86	95.85	21.55
dead54	15.21	50698092	15.15	50696994	100	99.2	96.05	44.05	88.63	27.93
dead55	20.85	69513680	20.77	69512243	100	99.01	95.17	43.64	94.41	40.58
dead56	18.56	61875756	18.48	61874363	100	99.04	95.35	43.57	95.3	36.56
dead57	18.08	60252061	17.99	60196321	99.91	99.32	96.62	44.03	91.73	34.21
dead58	22.19	73951154	22.08	73882815	99.91	99.2	96.1	43.76	91.16	41.49
dead59	14.94	49800540	14.87	49773495	99.95	98.86	94.77	44.51	91.15	28.1
dead60	14.92	49723457	14.83	49676964	99.91	99.38	96.9	44.98	90.75	27.82
dead65	12.36	41204854	12.31	41182939	99.95	98.87	94.8	43.73	91.13	23.4
dead66	19.74	65783932	19.58	65746988	99.94	99.09	95.81	45.78	92.44	37.14
dead67	20.44	68136460	20.32	68100657	99.95	98.74	94.33	43.83	93.49	39.28
dead68	14.38	47918024	14.3	47916922	100	99.19	95.98	44.1	95.02	28.23
dead69	17.42	58059162	17.33	58027376	99.95	98.87	94.78	44.09	90.55	32.49
dead70	18.27	60912456	18.17	60857103	99.91	99.29	96.43	44.48	90.44	33.96
dead71	20.43	68103788	20.25	68065842	99.94	99.14	96.09	47	89.92	36.86
dead72	14.73	49103243	14.65	49102123	100	99.24	96.25	45.2	91.33	27.71
dead73	11.99	39977189	11.93	39976279	100	99.18	96.02	45.09	90.68	22.43
dead74	13.59	45295243	13.52	45253619	99.91	99.23	96.26	43.86	92.19	25.96
dead75	20.44	68141003	20.24	68103000	99.94	99.16	96.19	47.8	89.46	36.34
dead76	17.13	57093878	17.04	57092724	100	99.08	95.52	44.13	92.07	32.45
dead78	17.09	56977825	17.01	56976520	100	99.14	95.79	43.72	94.06	33.39
dead79	18.98	63280945	18.81	63245039	99.94	99.24	96.55	47.36	90.18	34.2
dead82	23.23	77426964	23.14	77425297	100	99.01	95.18	43.63	94.55	45.05
dead83	19.74	65802963	19.64	65742495	99.91	99.25	96.32	43.76	92.69	37.62
dead84	14.68	48938333	14.61	48911859	99.95	98.76	94.32	43.66	93.78	28.42
dead85	13.7	45670568	13.64	45646040	99.95	98.83	94.67	43.39	95.93	27.25
dead86	20.39	67973323	20.31	67971790	100	99.16	95.91	43.81	93.19	39.13
dead87	13.68	45614211	13.62	45613186	100	99.29	96.5	44.98	93.13	26.31
dead88	15.85	52822727	15.79	52821517	100	99.05	95.36	43.54	94.71	31.19
dead89	12.53	41767946	12.47	41767050	100	99.12	95.72	44.43	93.08	24.11
dead90	17.31	57700540	17.23	57669608	99.95	98.72	94.12	43.86	88.33	31.41
dead91	28.37	94576922	28.27	94575073	100	99.02	95.23	43.61	91.55	53.14
dead92	15.27	50907538	15.19	50881460	99.95	98.72	94.15	43.75	92.25	29.13
dead93	15.81	52705774	15.73	52676993	99.95	98.86	94.75	44.08	94.98	31.04
dead94	9.5	31659668	9.45	31622691	99.88	97.7	95.05	43.59	91.96	18.21
dead95	17.7	59006726	17.64	59005482	100	99.09	95.55	43.56	91.34	33.5
dead96	13.98	46603636	13.92	46578991	99.95	98.71	94.07	43.64	92.21	26.75
dead97	14.3	47676941	14.24	47651075	99.95	98.85	94.72	43.54	91.96	27.24
dead98	13.69	45623742	13.62	45599988	99.95	98.72	94.03	44.08	91.83	25.87
dead99	17.23	57432552	17.16	57431149	100	99.16	95.92	43.93	90.01	32.03
dead100	17.63	58770106	17.56	58768808	100	99.11	95.7	43.86	89.8	32.67
dead101	26.8	89334064	26.71	89331004	100	99	95.31	43.79	97.78	53.23
dead103	13.18	43945990	13.11	43921942	99.95	98.89	94.93	43.78	94.62	25.83
dead107	12.45	41492051	12.4	41490746	100	98.51	94.17	43.73	89.49	23.09
dead108	12.67	42231427	12.62	42230200	100	98.46	94	43.7	91.05	24.03
dead109	15.56	51865497	15.38	51863947	100	99.02	96.06	47.87	89.52	27.88
dead110	12.53	41753680	12.48	41752376	100	98.4	93.8	43.94	88.96	23.11
dead111	18.69	62287743	18.6	62254484	99.95	98.65	93.83	43.55	91.58	35.24
dead112	20.5	68345820	20.41	68284656	99.91	99.14	95.77	43.71	90.37	38.12
dead114	14.25	47506110	14.18	47480503	99.95	98.84	94.63	45.12	88.7	26.02
dead115	13.27	44243703	13.22	44242461	100	98.52	94.22	43.61	90.18	24.9
dead116	12.88	42948125	12.84	42946806	100	98.4	93.7	43.92	87.86	23.47
dead118	16.6	55345892	16.45	55314542	99.94	99.1	95.92	47.15	90.25	30.03
dead119	13.03	43449336	12.99	43447979	100	98.54	94.28	44.03	88.76	23.92
dead120	15.23	50751413	15.01	50702480	99.9	99.54	97.69	48.89	88.25	26.33
dead122	11.72	39077580	11.67	39076409	100	98.43	93.81	43.84	88.7	21.6
dead123	18.02	60079083	17.88	60077134	100	98.96	95.83	46.66	91	33.4
dead124	13.04	43467267	12.97	43465960	100	98.73	94.04	44.35	89.74	24.18
dead126	15.78	52593602	15.73	52583019	99.98	99.13	97.07	44.49	86.94	28.01
dead127	14.32	47738641	14.22	47737534	100	99.28	96.44	46.31	88.47	25.92
dead128	15.7	52344251	15.66	52321801	99.96	99.13	97.23	44.51	84.22	26.94
dead129	9.64	32121973	9.61	32106548	99.95	99.25	97.63	44.51	84.49	16.81
dead132	16.59	55298986	16.53	55247913	99.91	99.26	96.33	44.8	80.47	27.2
dead134	15.61	52023387	15.54	52021633	100	99.06	95.6	45.02	87.03	28.06
dead135	17.1	56985366	16.91	56983505	100	99.33	96.89	48.56	84.69	28.91
dead136	15.77	52550084	15.69	52548330	100	99.02	95.36	44.78	83.72	27.22
dead138	11.21	37351645	11.14	37350782	100	99.23	96.18	46.17	82.25	19.11
dead139	10.83	36112704	10.77	36111883	100	99.28	96.44	46.29	87.69	19.51
dead140	13.98	46612358	13.93	46610920	100	98.42	93.87	43.98	91.61	26.56
dead141	14.87	49550024	14.75	49548816	100	99.32	96.64	46.79	89.7	27.03
dead142	21.65	72170468	21.56	72168978	100	98.94	94.86	43.65	92.48	41.23
dead143	18.29	60951614	18.21	60950346	100	98.82	94.24	43.8	87.94	33.08
dead144	15.3	51001313	15.22	50999841	100	98.63	94.6	45.29	91.05	28.6
dead145	18.52	61730747	18.44	61729534	100	99.07	95.47	43.93	88.48	33.68
dead146	23.86	79520423	23.75	79518819	100	99.03	95.28	43.54	92.04	45.02
dead147	9.88	32921075	9.75	32920318	100	99.37	96.82	47.47	94.55	18.89
dead148	26.43	88111355	26.3	88030784	99.91	99.21	96.12	43.8	91.3	49.42
dead149	11.33	37765726	11.28	37764599	100	98.4	93.77	43.86	92.76	21.87
dead150	17.68	58932201	17.59	58901773	99.95	98.56	93.39	43.71	89.36	32.46
dead151	23.23	77444781	23.14	77443037	100	99.09	95.54	43.72	89.62	42.8
dead152	13.99	46642591	13.94	46641247	100	98.48	94.01	43.82	92	26.77
dead153	13.78	45919378	13.72	45918050	100	98.39	93.63	43.73	90.21	25.79
dead154	23.6	78681513	23.51	78679955	100	99.09	95.55	43.8	83.43	40.32
dead155	14.34	47798715	14.26	47797439	100	98.64	94.67	45.01	89.81	26.45
dead156	19.32	64386363	19.24	64385038	100	98.98	94.98	44.06	84.2	33.41
dead157	12.14	40459187	12.09	40458100	100	98.49	94.11	44.25	82.52	20.74
dead158	18.15	60505321	18.07	60474506	99.95	98.58	93.45	43.66	88.72	33.02
dead159	17.86	59524840	17.75	59493211	99.95	98.87	94.8	44.58	82.43	30.13
dead160	11.96	39882069	11.91	39880935	100	98.46	94.01	44.07	81.55	20.08
dead161	23.26	77546966	23.12	77501609	99.94	99.35	97.01	44.57	90.08	42.25
dead162	11.59	38618440	11.54	38598499	99.95	98.68	93.92	44.03	81.72	19.63
dead163	12.1	40343759	12.05	40342483	100	98.39	93.76	43.95	87.83	22.07
dead164	13.79	45952834	13.73	45951445	100	98.5	94.03	44.18	83.78	23.71
dead166	29.32	97744219	29.21	97654050	99.91	99.35	96.75	45.36	87.51	51.73
dead167	16.98	56588328	16.89	56558222	99.95	98.65	93.77	43.85	84.14	29.3
dead168	12.45	41501270	12.39	41500211	100	98.4	93.52	44.22	81.12	20.79
dead169	13.85	46165853	13.79	46164530	100	98.57	94.38	44.16	86.89	24.9
dead170	13.64	45451600	13.59	45438938	99.97	99.22	97.45	45	88.45	24.62
dead171	21.35	71182611	21.27	71181138	100	99.03	95.3	44.02	85.43	37.42
dead172	12	40013533	11.1	40012102	100	99.4	97.84	44.06	86.33	19.98
dead173	10.4	34663748	10.35	34662688	100	98.46	93.97	44.39	80.96	17.52
dead174	10.84	36132516	10.8	36131497	100	98.56	94.28	44.63	81.2	18.36
dead176	10.59	35307167	10.55	35306218	100	98.46	93.96	44.51	82.4	18.17
dead179	12.05	40175347	12	40174179	100	98.43	93.87	43.74	93.02	23.29
dead180	13.77	45903087	13.72	45901906	100	98.5	94.14	44.15	82.28	23.35
dead181	18.91	63038348	18.84	63037101	100	99.03	95.25	44.28	80.42	31.15
dead183	14.04	46809808	13.94	46808463	100	98.78	95.16	46.38	90.51	25.82
dead185	22.55	75150528	22.45	75149014	100	98.95	94.86	43.56	96.09	44.72
live1	13.24	44136664	13.15	44075349	99.86	98.96	96.77	46.44	83.3	22.63
live2	12.28	40939434	12.23	40936377	99.99	99.04	95.14	44.19	88.77	22.63
live4	15.61	52041501	15.52	52037133	99.99	99.23	96.1	45.91	89.65	28.44
live5	12.64	42134647	12.58	42131470	99.99	99.07	95.26	44.75	89.32	23.41
live6	9.59	31970204	9.54	31967779	99.99	99.13	95.65	46.03	85.04	16.88
live7	13.21	44027155	13.15	44023625	99.99	99.11	95.47	44.34	88.57	24.16
live9	14.02	46731264	13.87	46687651	99.91	99.47	97.35	48.09	88.7	24.92
live12	10.15	33817343	10.11	33800975	99.95	99.18	97.44	44.83	89.61	18.54
live13	12.44	41451025	12.37	41449885	100	98.63	94.54	44.22	94.36	24.3
live14	11.06	36863758	10.99	36860479	99.99	99.34	96.64	47.4	85.78	19.23
live15	10.24	34146400	10.2	34143871	99.99	99.01	95.01	44.66	80.25	17.07
live16	9.18	30611989	9.15	30598004	99.95	99.26	97.65	44.7	89.27	16.91
live17	13.98	46589895	13.92	46586513	99.99	98.93	94.73	44.73	81	23.5
live18	11.22	37386945	11.15	37383617	99.99	99.26	96.31	46.29	94.03	21.56
live19	10.48	34931192	10.45	34914890	99.95	99.15	97.32	44.75	89.32	19.11
live20	9.38	31260549	9.35	31245144	99.95	99.3	97.8	44.9	84.59	16.29
live21	14.01	46693643	13.94	46692085	100	98.86	94.67	44.69	87.31	25.11
live22	15.11	50381949	15.02	50380424	100	98.82	95.34	47.05	83.81	25.72
live23	17.91	59710077	17.79	59708174	100	99.29	96.66	47.24	91.45	32.98
live24	10.79	35954868	10.73	35954096	100	99.15	95.81	44.95	85.03	19.01
live25	13.1	43659708	13.05	43621090	99.91	99.24	96.21	44.89	86.2	22.99
live26	10.25	34160716	10.15	34159809	100	99.41	97.08	47.96	89.1	18.51
live27	8.84	29450975	8.8	29450123	100	98.48	94.03	44.94	80.18	14.77
live28	12.74	42464825	12.66	42450985	99.97	99.12	96.89	46.04	92.09	23.98
live30	9.35	31178755	9.33	31164073	99.95	99.23	97.59	44.36	94.29	18.08
live31	11.96	39878435	11.89	39877521	100	99.21	96.12	45.91	85.34	21.04
live32	13.09	43622081	13.03	43621215	100	99.13	95.71	45.14	81.3	22.01
live33	10.59	35305062	10.54	35303954	100	98.51	94.19	44.31	95.65	21.02
live34	13.23	44105734	13.18	44104346	100	98.8	94.37	44.85	82.65	22.72
live35	14.31	47688806	14.23	47687243	100	99.03	95.45	45.75	82.57	24.35
live36	11.6	38657503	11.52	38656288	100	98.72	94.97	46.41	85.39	20.38
live38	10.53	35103350	10.49	35100494	99.99	99.09	95.37	44.27	88.06	19.28
live40	11.9	39681088	11.85	39678138	99.99	99.05	95.19	44.95	83.62	20.71
live41	13.45	44827566	13.35	44823893	99.99	99.16	95.76	44.08	90.27	25.02
live43	17.12	57069705	17.05	57017330	99.91	99.25	96.34	44.91	90.94	31.37
live44	23.95	79818893	23.86	79745782	99.91	99.22	96.17	45.12	88.25	42.83
live45	9.36	31210235	9.27	31195806	99.95	99.2	97.5	44.25	90.17	17.44
live46	13.79	45974091	13.59	45972797	100	98.85	95.45	46.56	88.6	24.69
live47	14.49	48285826	14.32	48284201	100	98.65	94.81	44.43	93.17	27.59
live48	16.67	55580543	16.61	55529955	99.91	99.21	96.08	44.45	93.7	31.74
live49	11.58	38600931	11.48	38599695	100	98.53	94.32	44.57	89.31	21.27
live51	12.62	42064053	12.47	42060649	99.99	99.12	95.6	44.67	89.28	22.97
live52	12.6	42014841	12.49	42011457	99.99	99.18	95.88	44.34	91.49	23.75
live53	14.23	47430852	14.1	47427029	99.99	99.12	95.58	43.74	94.82	27.89
live54	14.13	47101124	14.03	47099682	100	98.73	95.07	44.65	88.2	25.48
live55	13.79	45961100	13.66	45959646	100	98.66	94.8	44.85	86.6	24.4
live56	12.11	40375976	11.99	40374870	100	98.55	94.37	44.76	89.88	22.18
live57	13.33	44447192	13.22	44445853	100	98.62	94.67	44.62	89.4	24.49
live58	14.52	48383403	14.46	48338392	99.91	99.26	96.33	44.87	90.32	26.78
live59	12.2	40677526	12.17	40665020	99.97	99.15	97.22	44.56	94.18	23.58
live60	12.75	42497357	12.64	42495939	100	98.66	94.86	44.49	91.49	23.93
live61	11.42	38066078	10.9	36643644	96.26	97.23	92.51	44.41	89.37	20.18
live62	12.83	42771066	12.72	42767737	99.99	99.14	95.66	43.88	92.58	24.56
live63	11.29	37619462	10.52	35452750	94.24	96.24	90.07	45.05	90.82	19.74
live64	12.08	40268000	11.25	37957814	94.26	96.39	90.48	45.63	89.09	20.72
live65	15.14	50462952	14.98	50461383	100	98.55	94.41	44.47	90.28	27.83
live66	11.18	37279727	10.66	35909217	96.32	97.07	92.14	44.01	92.36	20.59
live67	11.92	39741034	11.4	38367297	96.54	97.08	92.16	43.99	95.35	22.58
live68	9.13	30417666	8.53	28675371	94.27	95.8	88.9	44.33	89.81	15.93
live69	12.14	40468260	11.55	38878188	96.07	96.86	91.61	43.91	90.6	21.76
live70	9.87	32895395	9.22	31004678	94.25	95.97	89.35	44.15	89.87	17.27
live71	13.19	43981204	13.15	43959977	99.95	99.22	97.55	44.71	92.55	24.85
live72	13.5	44990164	13.37	44988776	100	98.6	94.58	44.62	91.23	25.15
live73	15.68	52250750	15.62	52203862	99.91	99.3	96.58	45	91.42	29.02
live74	7.36	24534158	7.33	24514108	99.92	98.46	96.35	44.55	94.68	14.34
live75	10.51	35040490	10.41	35039359	100	98.57	94.47	44.33	90.21	19.55
live76	18.64	62127543	18.36	62070835	99.91	99.32	96.6	45.78	91.16	34.17
live77	20.43	68098605	20.35	68035338	99.91	99.25	96.33	44.7	91.71	38.16
live78	12.58	41945469	12.48	41944288	100	98.58	94.5	44.38	92.43	23.84
live79	9.42	31388147	9.38	31373382	99.95	99.17	97.39	44.69	93.37	18.1
live80	10.29	34305251	10.2	34302567	99.99	99.12	95.62	44.58	90.17	18.97
live81	8.83	29421473	8.24	27737477	94.28	95.92	89.25	44.19	92.55	15.9
live82	13.59	45312184	13.49	45308565	99.99	99.12	95.63	44.66	89.91	24.99
live83	15.53	51767488	15.39	51765760	100	99	95.39	44.53	90.18	28.43
live85	13.13	43759965	13.09	43739268	99.95	99.16	97.32	44.94	90.37	24.2
live86	9.42	31410267	8.79	29611833	94.27	96.1	89.74	44.19	92.82	16.99
live87	13.11	43689272	12.56	42292596	96.8	97.42	93.06	44.68	85.72	22.38
live88	13.98	46600496	13.52	45391598	97.41	97.76	93.88	44.09	91.42	25.69
live90	9.22	30718451	8.62	28959894	94.28	96.07	89.62	44.2	91.46	16.45
live91	13.54	45121218	12.96	43605200	96.64	97.39	92.94	44.82	86.39	23.11
live92	22.25	74178526	22.08	74176110	100	98.94	95.06	44.29	90.57	41.18
live93	8.71	29023831	8.12	27356296	94.25	96.15	89.83	43.9	92.01	15.65
live94	26.08	86940264	25.84	86937421	100	99	95.37	44.09	94.81	50
live95	10.17	33909627	9.98	33908418	100	99.17	96.67	49.12	85.25	17.08
live96	8.89	29618655	8.3	27931023	94.3	96	89.48	44.06	93.22	16.12
live97	10.17	33888065	10.14	33872148	99.95	99.16	97.35	44.54	87.74	18.24
live98	9.9	33000111	9.81	32998951	100	98.73	95.01	44.26	94.91	19.39
live99	16.5	55016082	16.33	55014464	100	98.89	95.62	45.46	94.23	31.62
live100	11.3	37654959	10.53	35484398	94.24	96.06	89.61	44.29	89.39	19.6
live101	12.01	40043681	11.95	40008119	99.91	99.21	95.91	44.87	90.81	22.52
live102	10.73	35782967	10.68	35780341	99.99	99.09	95.42	45.09	89.22	19.79
live103	12.96	43195360	12.92	43184601	99.98	99.13	97.12	45.01	90.8	23.98
live104	12	40000042	11.95	39998911	100	98.52	94.22	44.17	92.14	22.93
live105	12	40000975	11.96	39982957	99.95	99.31	97.85	45.44	86.27	21.07
live106	10.75	35835857	10.71	35818391	99.95	99.38	98.06	44.46	93.55	20.54
live107	9.85	32833115	9.82	32830808	99.99	98.99	94.82	44.48	85.13	17.52
live108	9.07	30226209	9.04	30212489	99.95	99.1	97.16	44.82	86.65	16.17
live109	12.41	41361896	12.36	41360801	100	98.45	93.96	44.6	82.55	21.27
live110	14.37	47908773	14.31	47907202	100	98.87	94.72	44.26	91.36	27.18
live111	10.04	33478322	10.01	33462131	99.95	99.28	97.72	44.51	87.83	18.19
live112	11.23	37422431	11.15	37311716	99.7	99.1	97.03	44.16	91.41	21.33
live113	11.01	36696111	10.97	36678872	99.95	99.24	97.6	44.9	86.6	19.57
live114	13.16	43878669	13.01	43818195	99.86	99.22	97.63	48.27	88.32	23.19
live115	11.05	36825574	11	36822880	99.99	99.04	95.19	44.55	86.38	19.91
live116	10.61	35353771	10.57	35337074	99.95	99.32	97.83	44.36	90.74	19.92
live117	14.93	49777949	14.8	49776324	100	99.23	96.4	47.99	83.5	25.12
live119	12.06	40207742	12	40204072	99.99	99.29	96.44	47.1	85.22	21.14
live121	10.39	34635138	10.36	34618770	99.95	99.15	97.33	44.71	91.61	19.54
live122	9.4	31316927	8.78	29601546	94.52	95.72	89.09	45.91	89.41	16.24
live123	10.3	34322741	9.63	32359876	94.28	96.25	90.17	44.49	88.94	17.91
live124	16.38	54596514	16.34	54583183	99.98	99.26	97.56	45.12	89.32	30.02
live125	10.48	34932826	10.45	34915715	99.95	99.17	97.4	45.16	87.23	18.66
live126	12.99	43289907	12.89	43286777	99.99	99.04	95.17	44.07	91.73	24.46
live127	12.72	42399151	12.6	42396186	99.99	98.95	94.78	44.22	91.54	23.87
live128	9.08	30261836	8.96	30259221	99.99	99.29	96.45	47.18	88.35	16.13
live129	11.74	39121009	11.7	39103669	99.96	99.2	97.48	44.47	92.17	22.29
live130	12.26	40869713	11.74	39462371	96.56	97.25	92.62	44.49	89.62	21.68
live131	11.85	39488647	11.81	39471083	99.96	99.21	97.53	45.03	93.8	22.73
live132	10.7	35673409	10	33609535	94.21	96.21	90.03	44.19	93.35	19.42
live133	9.13	30446058	8.54	28712403	94.31	95.77	88.89	44.13	89.86	16.06
live134	11.84	39464028	11.8	39449736	99.96	99.32	97.8	44.79	89.97	21.83
live135	12.46	41537735	12.07	40551720	97.63	97.69	93.66	43.97	91.59	22.88
live136	9.53	31759111	8.91	29972377	94.37	95.92	89.24	44.23	90.91	16.89
live137	13.6	45339663	13.03	43764102	96.52	97.19	92.44	44.55	87.46	23.52
live138	10.45	34822951	10.38	34820510	99.99	99.03	95.15	44.18	89.62	19.3
live139	11.05	36817681	10.96	36815396	99.99	99.17	96.06	44.34	88.99	20.34
live140	11.36	37876018	11.28	37873138	99.99	99.08	95.4	44.31	90.25	21.23
live141	10.01	33382381	9.94	33367279	99.95	99.25	97.68	44.26	91.68	18.89
live142	9.45	31495777	9.4	31493620	99.99	98.97	94.84	43.62	94.78	18.6
live143	10.33	34440494	10.26	34437838	99.99	99.07	95.34	44.01	89.43	19.09
live144	10.8	36002338	10.72	35994157	99.98	99.15	96.26	44.05	89.65	19.9
live145	16.09	53626455	16.03	53578549	99.91	99.18	95.89	45.3	91.07	29.59
live146	12.18	40613182	12.14	40593698	99.95	99.18	97.46	44.99	89.22	22.3
live147	12.79	42639164	12.68	42637760	100	98.63	94.64	44.39	90.45	23.83
live148	8.89	29631079	8.82	29628988	99.99	99.04	95.12	43.89	93.27	17.23
live149	9.3	30985205	9.23	30982842	99.99	99.05	95.25	44.09	90.58	17.46
live150	14.73	49102266	14.64	49092241	99.98	98.81	95.62	43.86	92.84	28.26
live151	11.08	36941279	11	36938566	99.99	99.01	95.03	44.35	88.5	20.19
live152	10.14	33798312	10.1	33781494	99.95	99.3	97.81	44.85	91.89	18.94
live153	22.08	73583747	22	73517524	99.91	99.34	96.76	45.11	90.33	40.3
live154	12.86	42861458	12.82	42849348	99.97	99.22	97.42	44.88	91.94	24.38
live155	16.97	56557702	16.73	56552397	99.99	99.42	97.07	49.04	83.11	27.88
live156	9.3	31002858	9.27	30989320	99.96	99.19	97.45	44.64	92.71	17.78
live157	10.21	34046006	10.15	34043254	99.99	99.13	95.64	43.85	91.92	19.5
live158	10.43	34770413	10.37	34767756	99.99	99.1	95.47	44.13	91.79	19.82
live159	9.81	32697968	9.78	32682758	99.95	99.12	97.24	44.63	90.91	18.4
live160	9.88	32927342	9.81	32924994	99.99	99.01	94.94	43.6	94	19.3
live161	11.93	39775796	11.86	39774842	100	98.55	94.11	45.52	87.76	21.62
live162	9.98	33264433	9.92	33233190	99.91	99.38	96.88	46.43	87.55	17.91
live163	16.04	53478258	15.96	53474171	99.99	99.09	95.42	46.04	82.16	27.05
live164	9.91	33018841	9.87	33017873	100	98.46	94.04	44.31	90.89	18.79
live165	14.1	47011876	14.03	47010506	100	98.55	94.31	44.36	93.38	27.28
live166	14.21	47380078	14.09	47336330	99.91	99.4	96.94	47.16	83.04	23.99
live167	13.44	44807403	13.38	44805880	100	98.9	94.85	44.23	91.84	25.58
live168	15.21	50685874	15.13	50684166	100	98.71	94.93	45.51	85.04	26.56
live169	18.09	60286623	17.99	60284642	100	99.03	95.44	45.47	91.46	33.85
live170	18.77	62556147	18.66	62554053	100	99.07	95.64	45.77	90.73	34.74
live171	11.64	38800556	11.59	38797635	99.99	99.1	95.41	44.7	87.14	21.04
live172	14.61	48700935	14.53	48696741	99.99	99.24	96.16	45.86	90.64	27.1
live173	10.93	36430352	10.88	36429326	100	98.41	93.74	44.76	86.25	19.58
live174	11.44	38118011	11.38	38116939	100	98.59	94.45	44.75	86.17	20.55
live175	17.77	59230073	17.7	59173579	99.9	99.38	96.95	45.61	86.07	30.82
live176	10.48	34918704	10.42	34916030	99.99	99.07	95.32	44.9	84.82	18.5
live177	15.6	52001176	15.53	51997323	99.99	99.03	95.12	44.77	90.71	29.27
live178	9.72	32398623	9.68	32398409	100	99.31	97.51	45.25	84.02	16.97
live179	11.35	37821909	11.3	37820837	100	98.47	94.03	44.02	92.65	21.9
